# Supplementary material for: Enhanced visible-light-driven photocatalytic activity of Au@Ag core–shell bimetallic nanoparticles immobilized on electrospun TiO2nanofibers for degradation of organic compounds
Source: Royal Society of Chemistry journal article supplement (doi:10.1039/c6cy02085b), 2016-12-12
Supplement: c6cy02085b1.pdf [file c6cy02085b1.pdf]

## Supporting Information

### **Enhanced visible-light-driven photocatalytic activity of Au@Ag core-shell bimetallic nanoparticles immobilized on electrospun TiO<sub>2</sub> nanofibers for degradation of organic compounds**

Mrinmoy Misra,<sup>a,l</sup> Narendra Singh,<sup>a,bl</sup> and Raju Kumar Gupta<sup>\*a,b</sup>

<sup>a</sup> Department of Chemical Engineering, Indian Institute of Technology Kanpur, Kanpur-208016, UP, India

<sup>b</sup> Center for Nanosciences and Center for Environmental Science and Engineering, Indian Institute of Technology Kanpur, Kanpur-208016, UP, India

\*Corresponding author. Tel: +91-5122596972; Fax: +91-5122590104.

*E-mail address:* [guptark@iitk.ac.in](mailto:guptark@iitk.ac.in)

<sup>l</sup> Contributed equally.

### **Synthesis of Ag NPs**

In this synthesis method, 100 mL of 5 mM sodium citrate and 0.025 mM tannic acid, aqueous solution was refluxed at 115 °C. After 10 min, 1 mL of 25 mM silver nitrate aqueous solution was added in the mixed solution under the same conditions. The colour of the solution turned to yellow from colourless, indicating the formation of Ag NPs. The refluxing was continued for another 2 min and then the solution was cooled down at room temperature. To remove the unreacted chemicals, the colloidal solution was centrifuged and redispersed into DI water for further use.

### **Synthesis of Ag@TNF**

50 mg of previously prepared MPA functionalized TNF (S2) was dispersed in 10 mL of DI water. To immobilize the Ag NPs on the surface of TNF, 5 mL of the Ag NPs solution was mixed with the MPA functionalized TNF. The prepared Ag@TNF was washed with DI water *via* centrifugation, and the sample was dried in hot air oven at 60 °C overnight. The prepared sample was named as Ag@TNF.

### **Synthesis of physically mixed Ag, Au@TNF**

50 mg of previously prepared MPA functionalized TNF (S2) was dispersed in 10 mL of DI water. 2.5 mL of Ag NPs and 2.5 mL of Au NPs solutions were mixed with MPA functionalized TNF. The prepared sample was washed with DI water *via* centrifugation to remove unreacted chemical, and the sample was dried in hot air oven at 60 °C overnight. The prepared sample was named as Au+Ag@TNF.

**Table S1** Absorption peaks of all the samples

| <b>Sample name/material</b> | <b>SPR absorption of Au (nm)</b> | <b>SPR absorption of Ag (nm)</b> | <b>Absorption of TNF (nm)</b> | <b>Combined absorption of Ag and TNF (nm)</b> |
|-----------------------------|----------------------------------|----------------------------------|-------------------------------|-----------------------------------------------|
| Au NPs (S1)                 | 522                              | -                                | -                             | -                                             |
| TNF (S2)                    |                                  | -                                | 327                           | -                                             |
| Au@TNF (S3)                 | ~540                             | 329                              |                               |                                               |
| Au@Ag NPs (S11)             | 519                              | ~371                             | -                             | -                                             |
| Au@Ag NPs (S12)             | 518                              | ~376                             | -                             | -                                             |
| Au@Ag NPs (S13)             | 514                              | ~390                             | -                             | -                                             |
| Au@Ag@TNF (S4)              | ~542                             |                                  | -                             | ~330                                          |
| Au@Ag@TNF (S5)              | ~542                             |                                  | -                             | ~332                                          |
| Au@Ag@TNF (S6)              | ~542                             |                                  | -                             | ~333                                          |

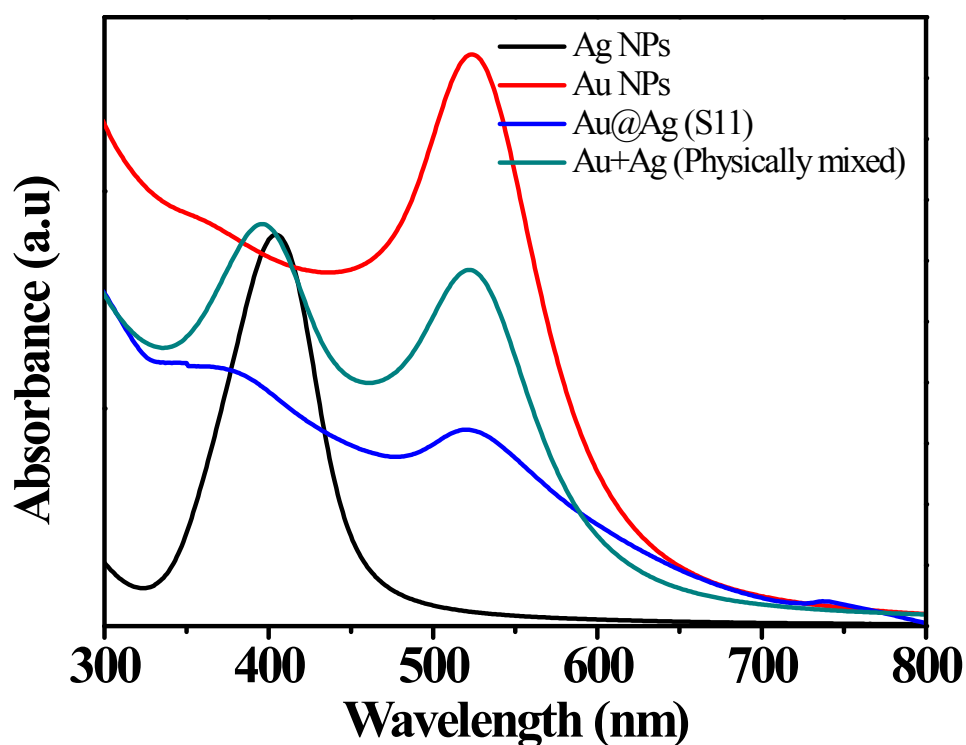

**Fig. S1** Optical absorption spectra of Au, Ag, Au@Ag core-shell, Au+Ag (physically mixed) nanostructures.

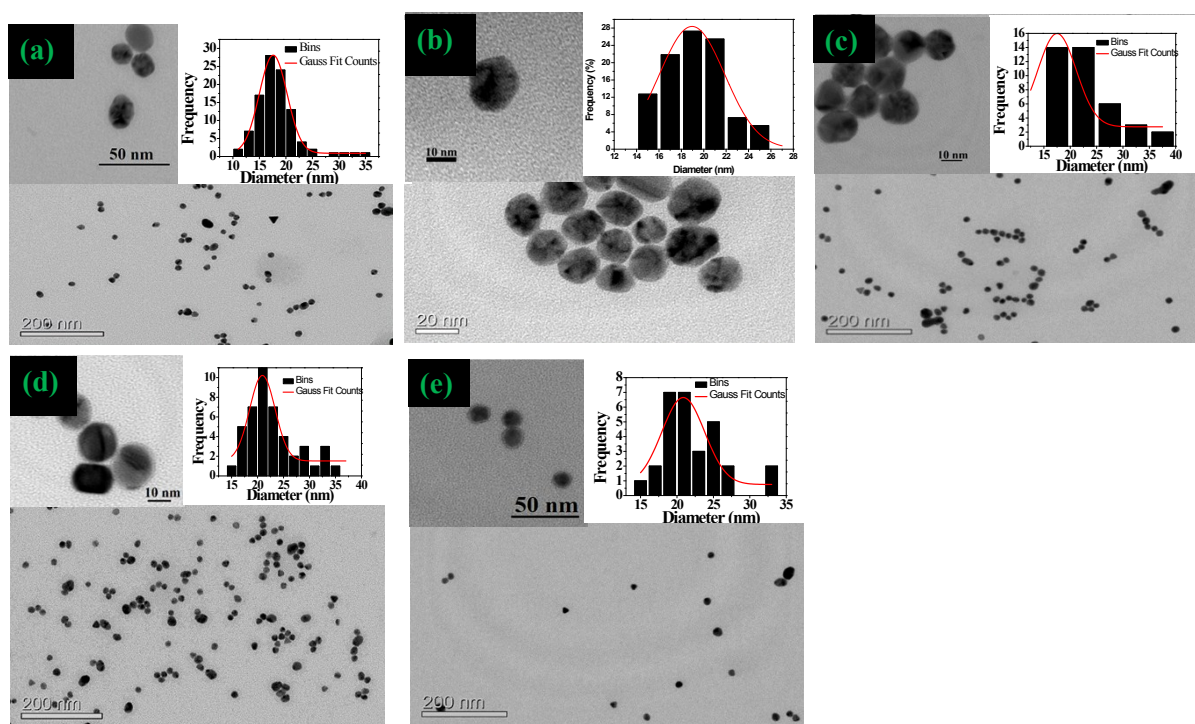

**Fig. S2** (a) TEM image of Au NPs (S1), (b) TEM image of Ag NPs, (c) TEM image of Au@Ag (S11), (d) TEM image of Au@Ag (S12) and (e) TEM image of Au@Ag (S13); Inset shows high magnification image and corresponding size distribution of NPs in the sample.

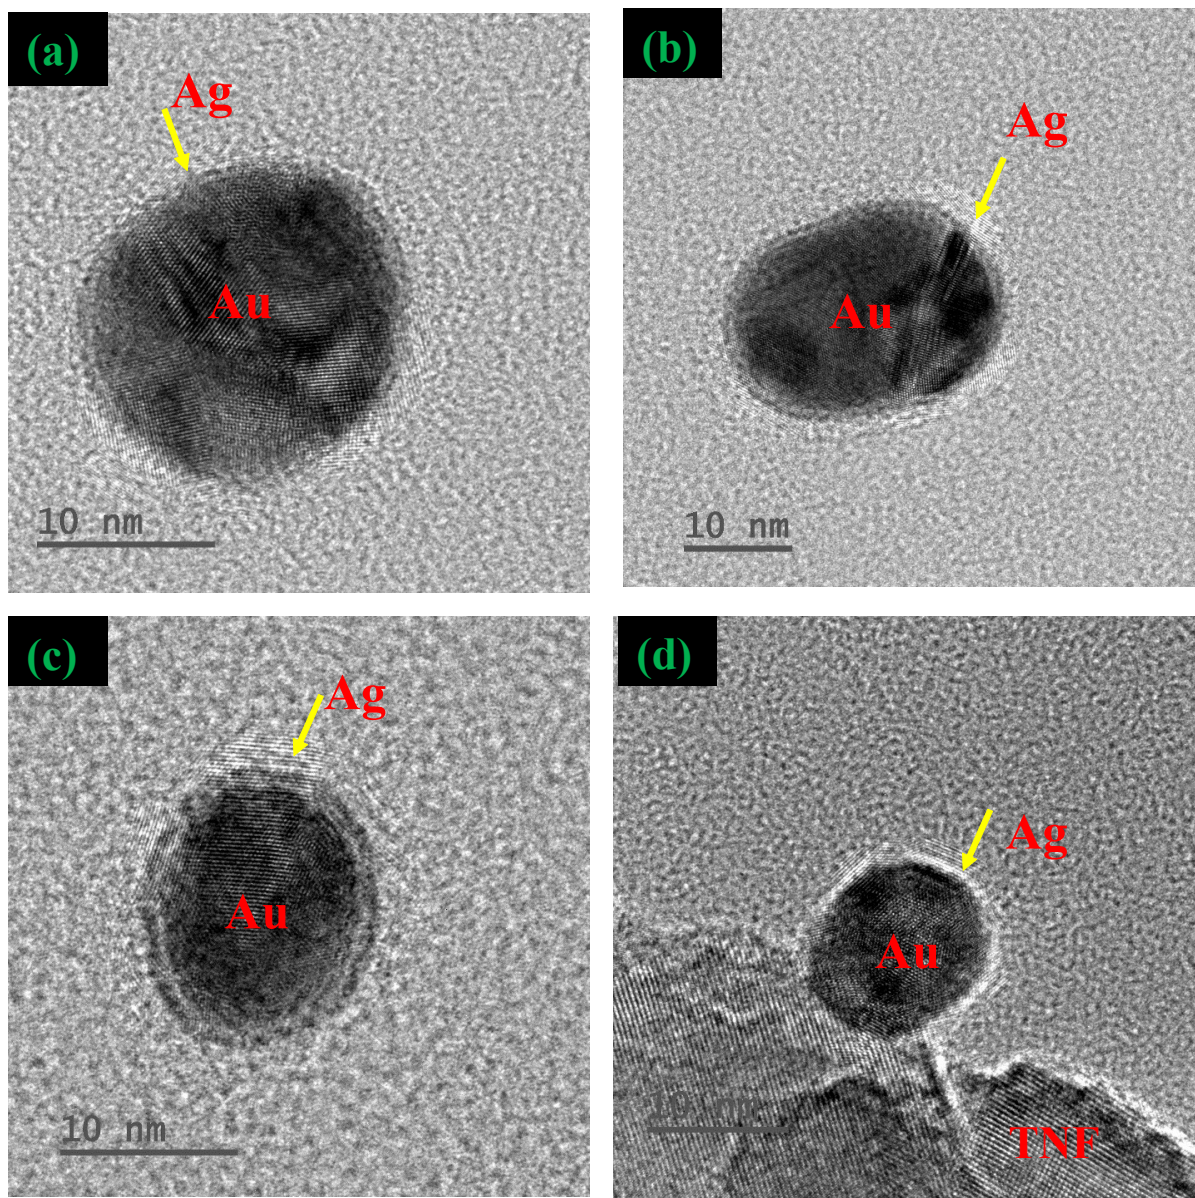

**Fig. S3** HRTEM image of (a) Au@Ag (S11), (b) Au@Ag (S12) and (c) Au@Ag (S13), and (d) Au@Ag@TiO<sub>2</sub> (S4).



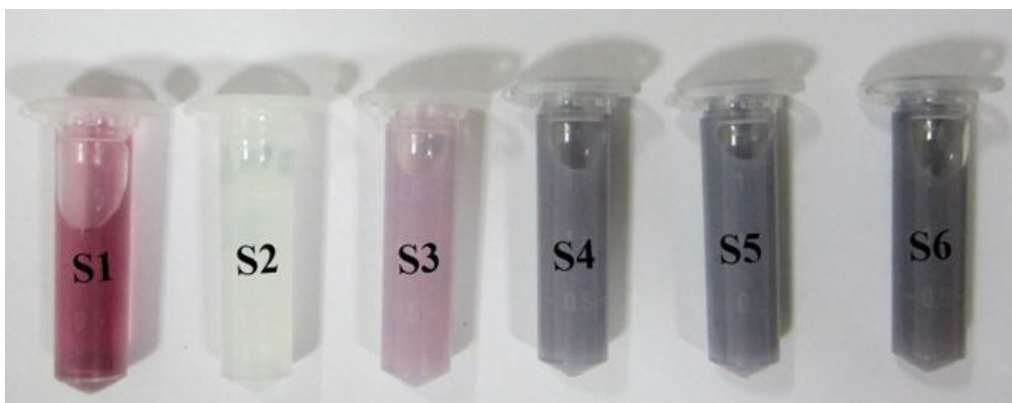

**Fig. S4** Photograph of (S1) Au NPs, (S2) TNF, (S3) Au@TNF, (S4) Au@Ag@TNF, (S5) Au@Ag@TNFs and (S6) Au@Ag@TNF solution.

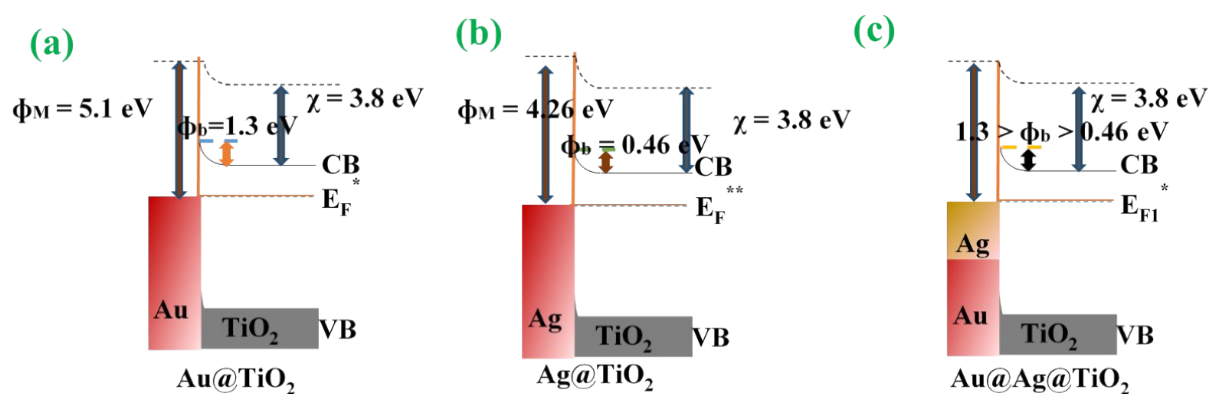

**Fig. S5** Schematic energy-band diagrams for (a) Au@TiO<sub>2</sub>, (b) Ag@TiO<sub>2</sub>, and (c) Au@Ag@TiO<sub>2</sub> nanostructure, where  $E_{vac}$ ,  $\Phi_M$ ,  $\Phi_b$ , and  $\chi$  denote the vacuum level, work function of metal, Schottky barrier height and electron affinity of TiO<sub>2</sub>. Fermi level of TiO<sub>2</sub>, Au@TiO<sub>2</sub> and Au@Ag@TiO<sub>2</sub> represent as  $E_F$ ,  $E_F^{**}$  and  $E_{F1}^*$  respectively (in eV).

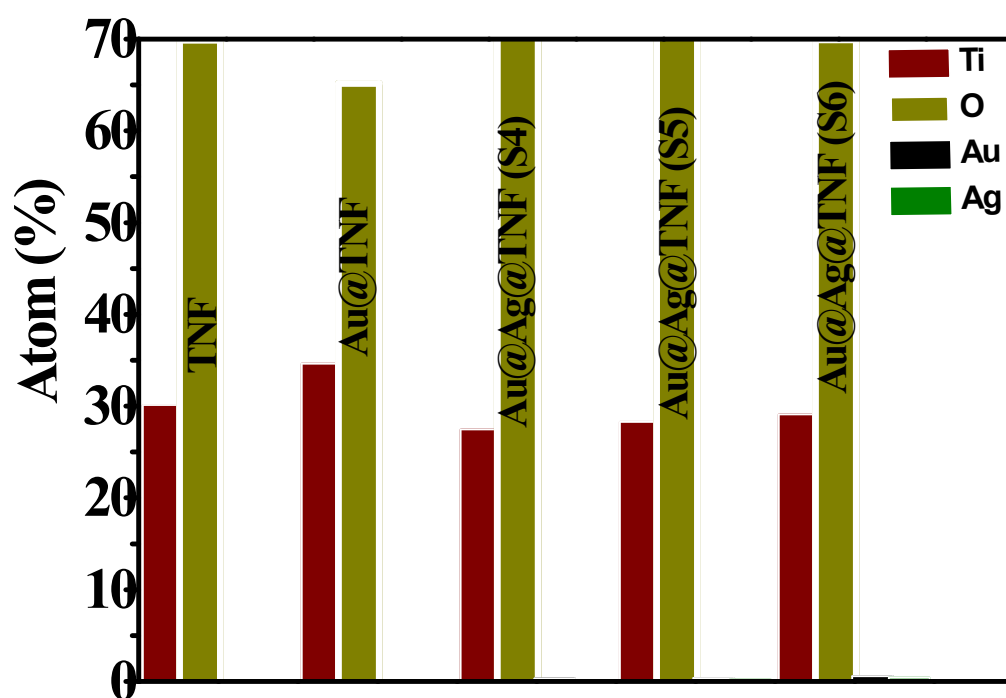

**Fig. S6** EDX analysis of different photocatalysts.

**Table S2** EDX of TNF, Au@ TNF and Au@Ag@ TNF with different Ag shell thickness on Au core

| Sample name        | Ti<br>(Atomic %) | O<br>(Atomic %) | Au<br>(Atomic %) | Ag<br>(Atomic %) |
|--------------------|------------------|-----------------|------------------|------------------|
| TNF (S2)           | 30.11            | 69.89           | -                | -                |
| Au@ TNF (S3)       | 34.64            | 65.19           | 0.17             | -                |
| Au@Ag@ TNF<br>(S4) | 27.46            | 72.10           | 0.33             | 0.10             |
| Au@Ag@ TNF<br>(S5) | 28.29            | 71.14           | 0.36             | 0.21             |
| Au@Ag@ TNF<br>(S6) | 29.11            | 69.90           | 0.57             | 0.42             |

**Table S3** Photocatalytic rate constants of the MB dye degradation using TNF, Au@ TNF and Au@Ag@ TNF with different Ag shell thickness under UV irradiation.

| Sample name    | Rate constant (min <sup>-1</sup> ) |
|----------------|------------------------------------|
| Au@TNF (S3)    | 0.0036                             |
| Au@Ag@TNF (S4) | 0.0047                             |
| Au@Ag@TNF (S5) | 0.0042                             |
| Au@Ag@TNF (S6) | 0.0037                             |
| TNF(S2)        | 0.0034                             |

**Table S4** Photocatalytic rate constants of the MB dye degradation using TNF, Au@ TNF and Au@Ag@ TNF with different Ag shell thickness under solar light irradiation.

| Sample name    | Rate constant (min <sup>-1</sup> ) |
|----------------|------------------------------------|
| Au@TNF (S3)    | 0.0130                             |
| Au@Ag@TNF (S4) | 0.0291                             |
| Au@Ag@TNF (S5) | 0.0176                             |
| Au@Ag@TNF (S6) | 0.0129                             |
| TNF (S2)       | 0.0100                             |



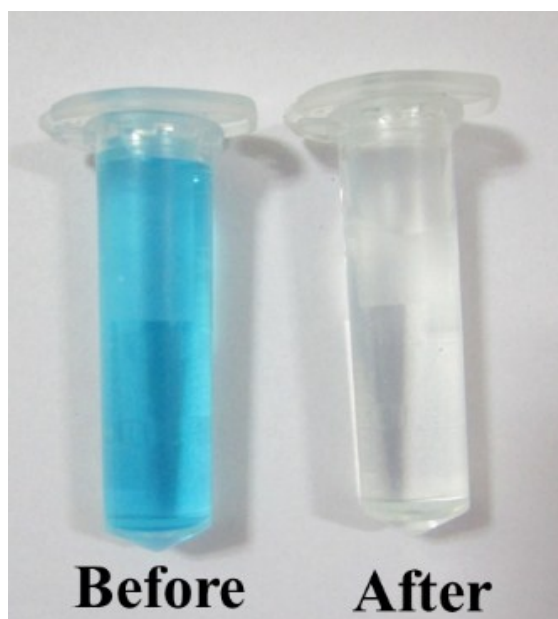

**Fig. S7** Photographs of MB dye before and after the photocatalytic degradation using Au@Ag@TNF (S4) photocatalyst under solar light irradiation.

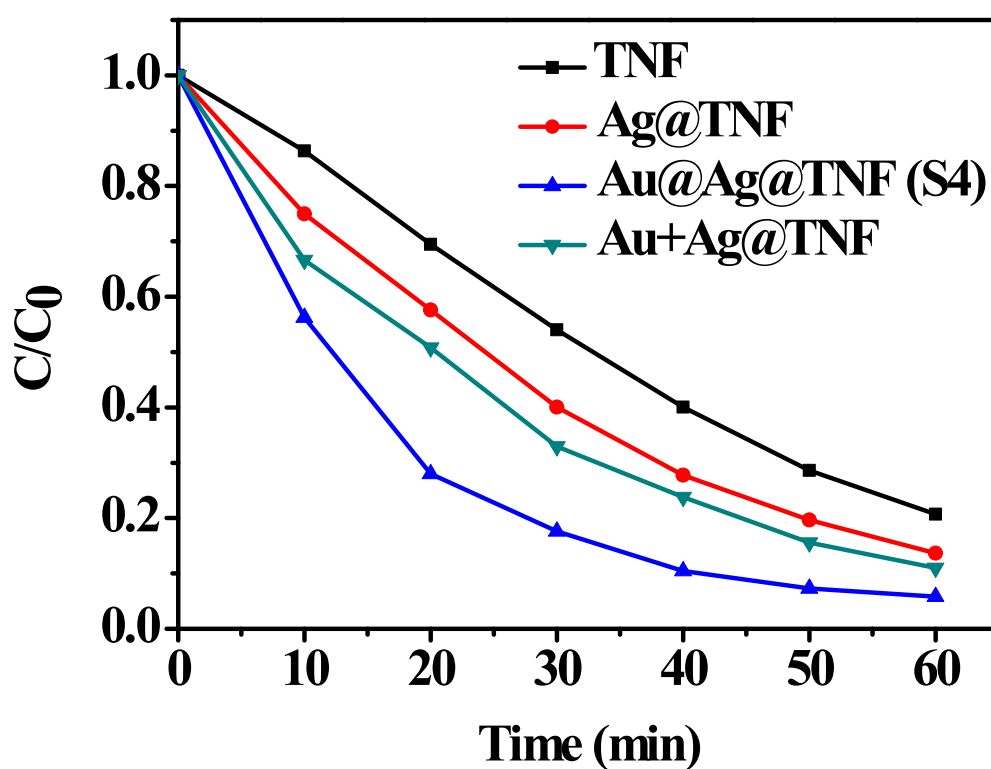

**Fig. S8** Kinetics of MB photo-degradation by TNF, Ag@TNF, Au@Ag@TNF (S4) and Au+Ag@TNF under solar light irradiance.

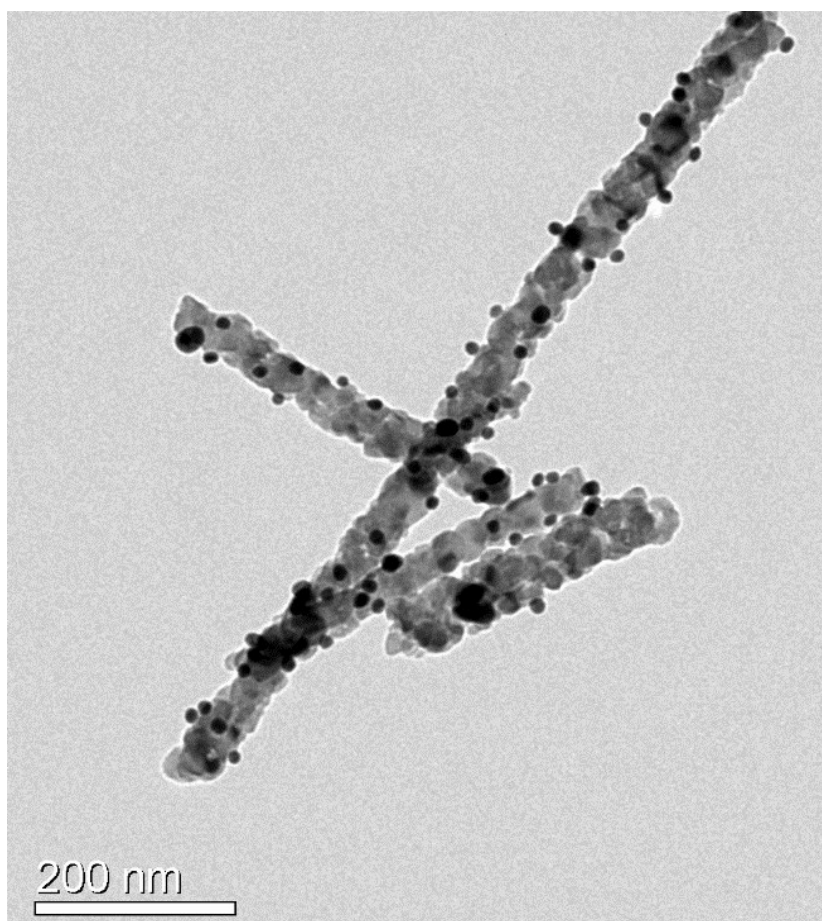

**Fig. S9** TEM image of Au@Ag@TNF (S4) photocatalyst after five successive cycles of photocatalytic runs.
